# Supplementary material for: Multimodal theranostic assemblies: double encapsulation of protoporphyrine-IX/Gd3+in niosomes
Source: Royal Society of Chemistry journal article supplement (doi:10.1039/c5ra26737d), 2016-01-01
Supplement: c5ra26737d1.pdf [file c5ra26737d1.pdf]

## Supplementary Information

### **Multimodal Theranostic Assemblings: Double Encapsulation of Protoporphyrine-IX/Gd<sup>3+</sup> in Niosomes**

F. B. Barlas<sup>a</sup>, B. Demir<sup>a</sup>, E. Guler<sup>a, b</sup>, A. Murat Senisik<sup>c</sup>, H. A. Arican<sup>d</sup>, P. Unak<sup>e</sup> and S. Timur<sup>a, b\*</sup>

<sup>a</sup>*Faculty of Science, Biochemistry Department, Ege University, 35100 Bornova, Izmir, Turkey*

<sup>b</sup>*Institute of Drug Abuse Toxicology & Pharmaceutical Sciences, Ege University, 35100  
Bornova, Izmir, Turkey*

<sup>c</sup>*Sifa University Hospital, 35100 Bornova, Izmir, Turkey*

<sup>d</sup>*Institute of Nuclear Sciences, Ege University, 35100 Bornova, Izmir, Turkey*

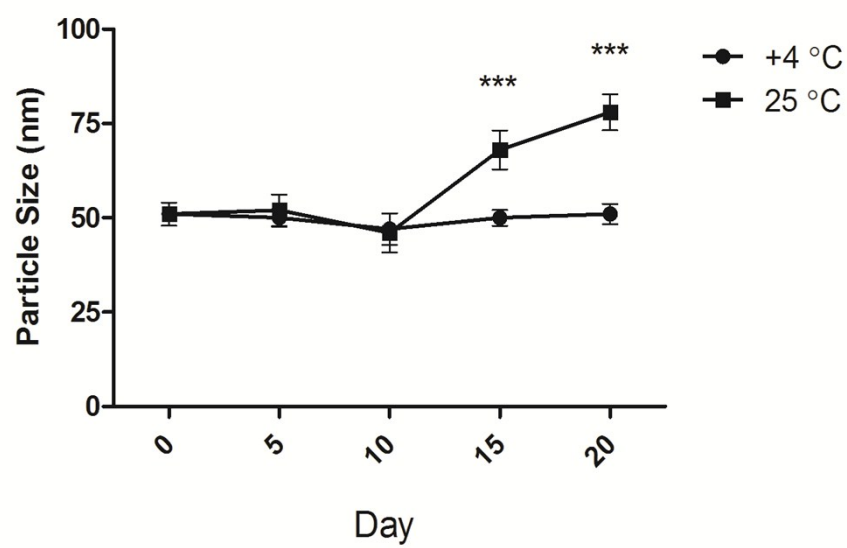

**Fig S1.** Short term size-dependent stability of prepared vesicles at two different storage temperatures.

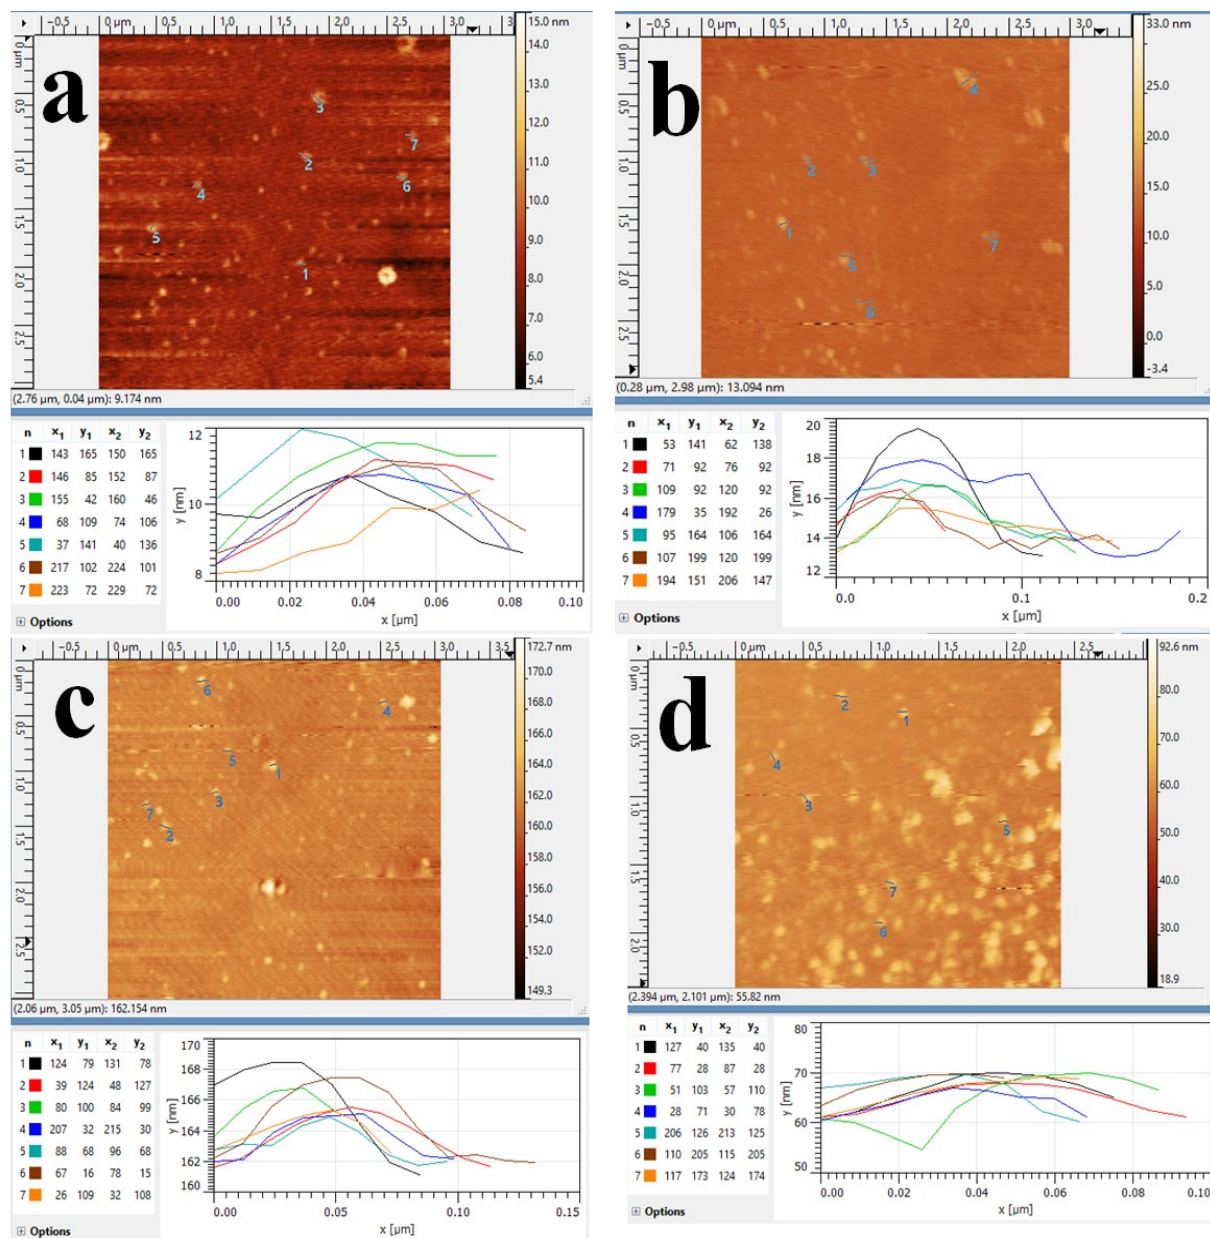

**Fig S2.** Detailed AFM analysis of plain niosome (a), Gd-NI (b), PpIX-NI (c) and Gd-PpIX-NI (d). (In the bottom graphs, the particle heights and widths were shown by picking seven spots from the dried sample. This demonstrated AFM height images were not baselined.)

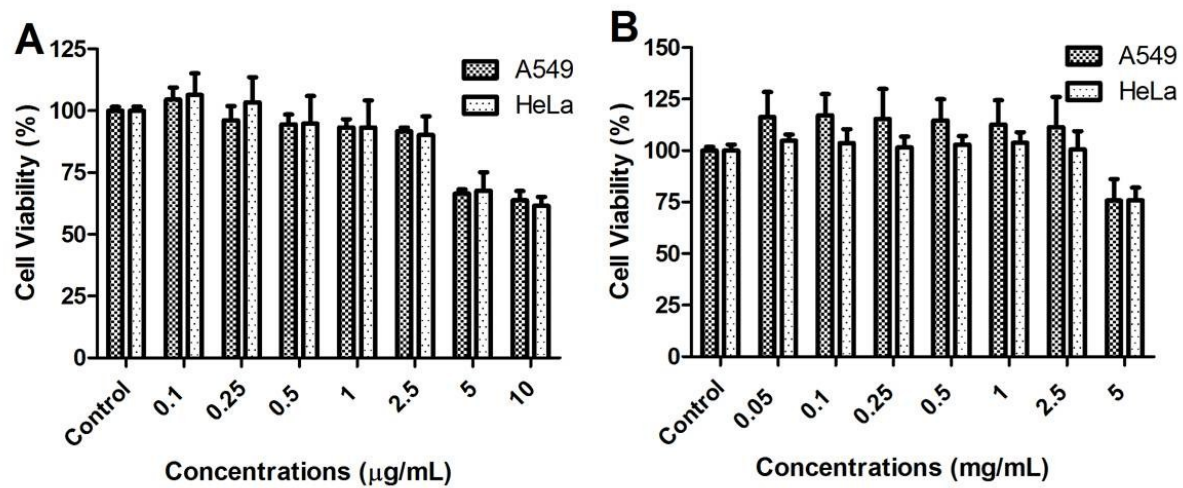

**Fig S3.** In vitro cytotoxicity assays for (A) PpIX and (B) GdNp on A549 and HeLa cell lines, Error bars mean  $\pm$  SD (n=4).
